# Supplementary material
Source: publisher site journal article supplement (https://www.dovepress.com/article/233322)
Supplement: Supplementary file 1 [file get_supplementary_file.php]

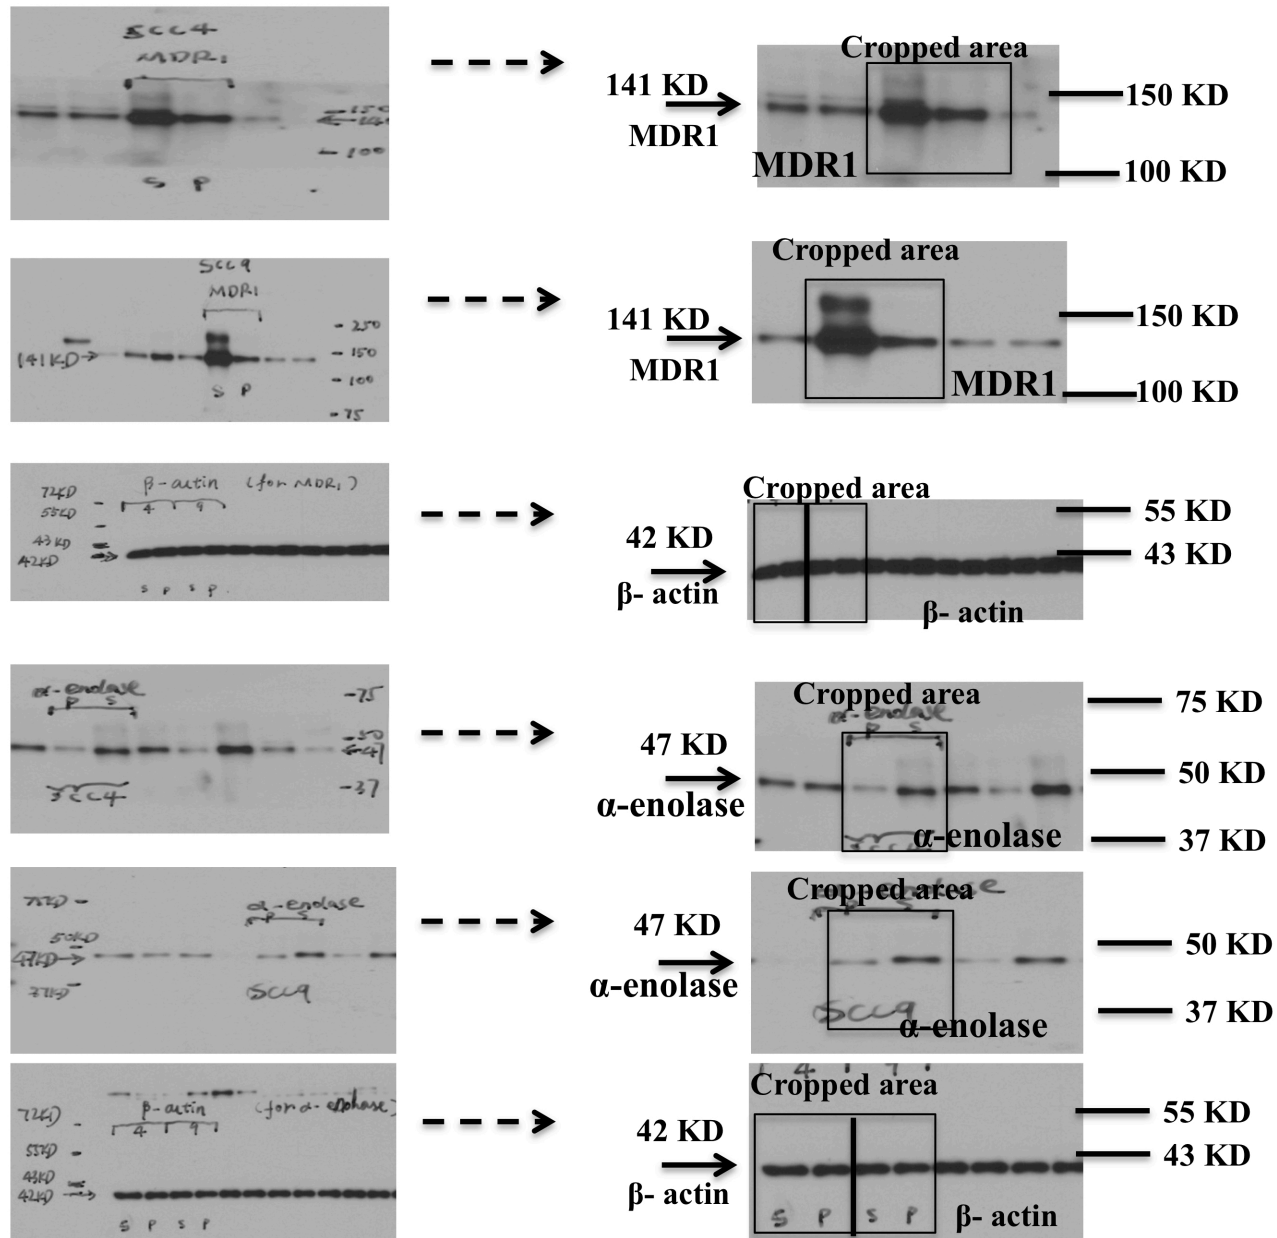

Uncropped WB blots of Figure 2B

Supplementary Figure S1

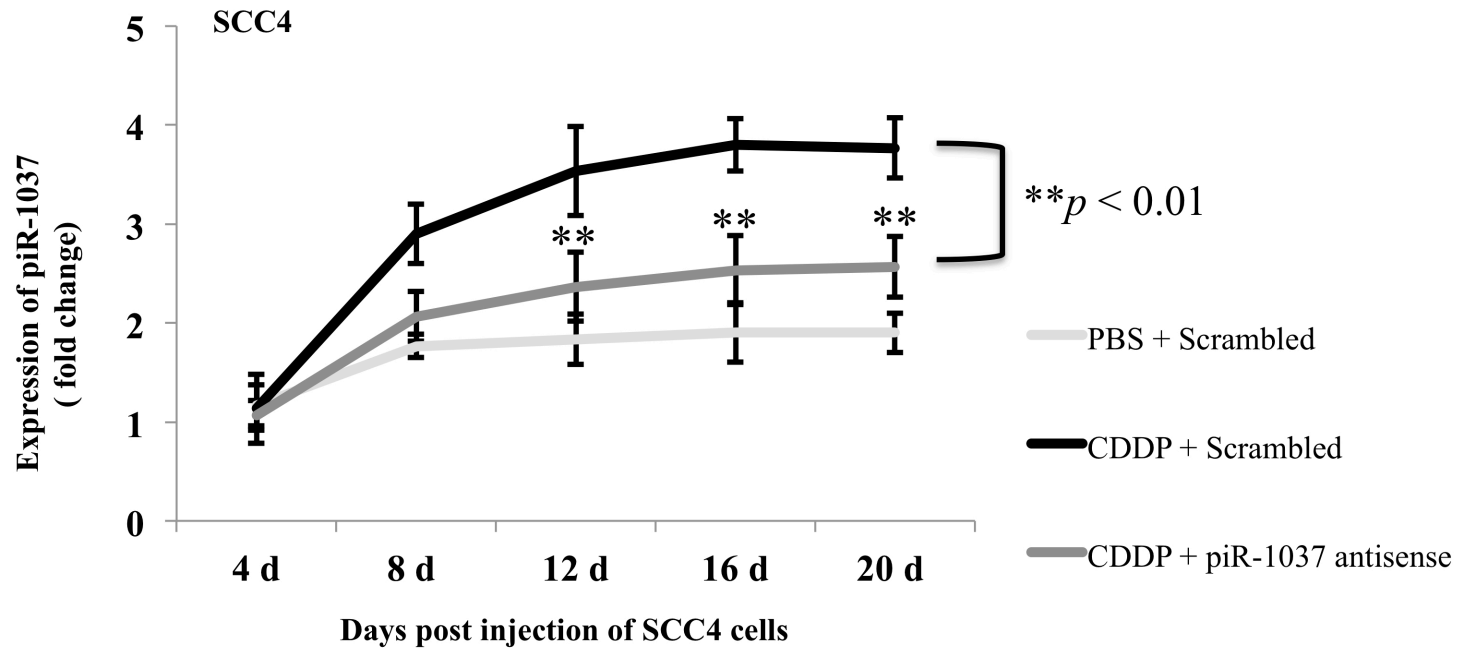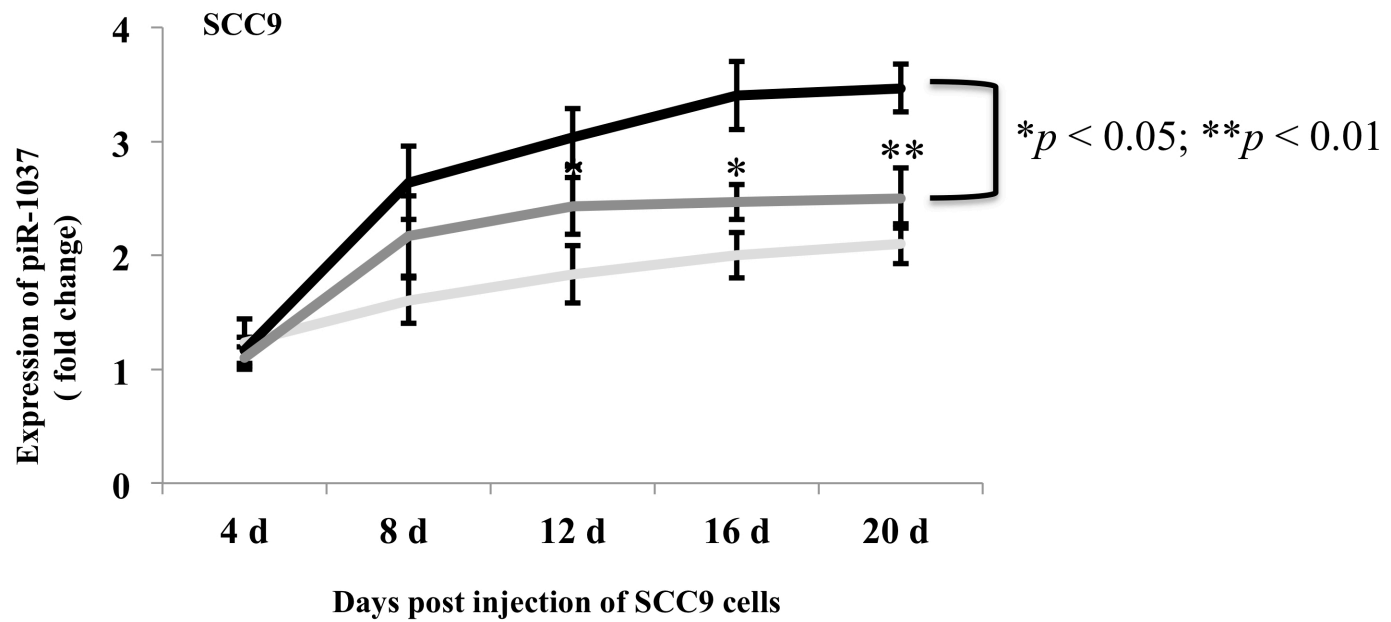

**Supplementary Figure S2**

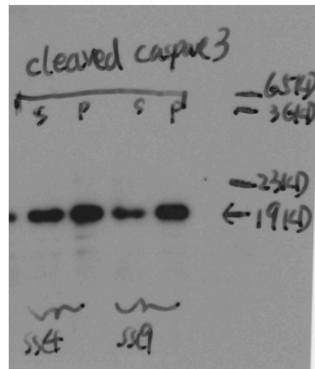

----->

Cleaved caspase-3 19 KD

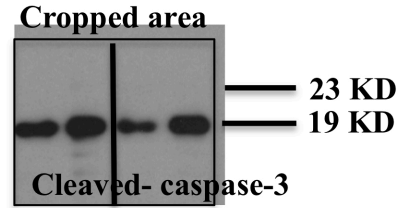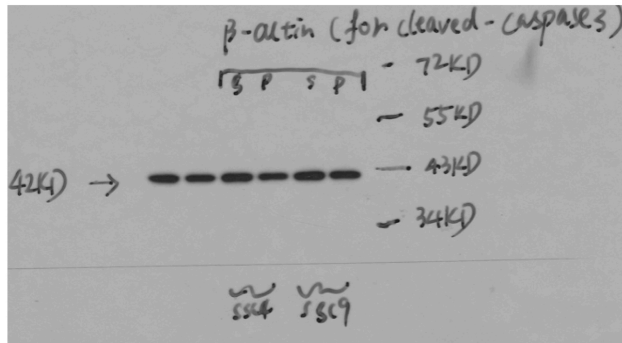

----->

$\beta$ - actin (42 KD)

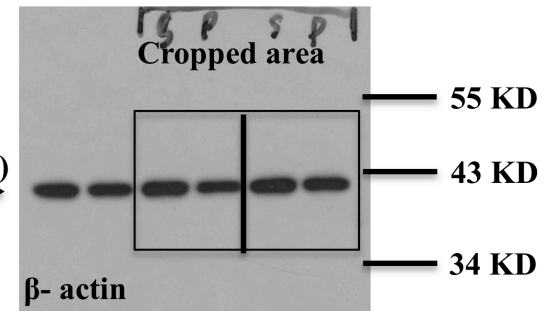

Uncropped blots for Figure 3C

Supplementary Figure S3

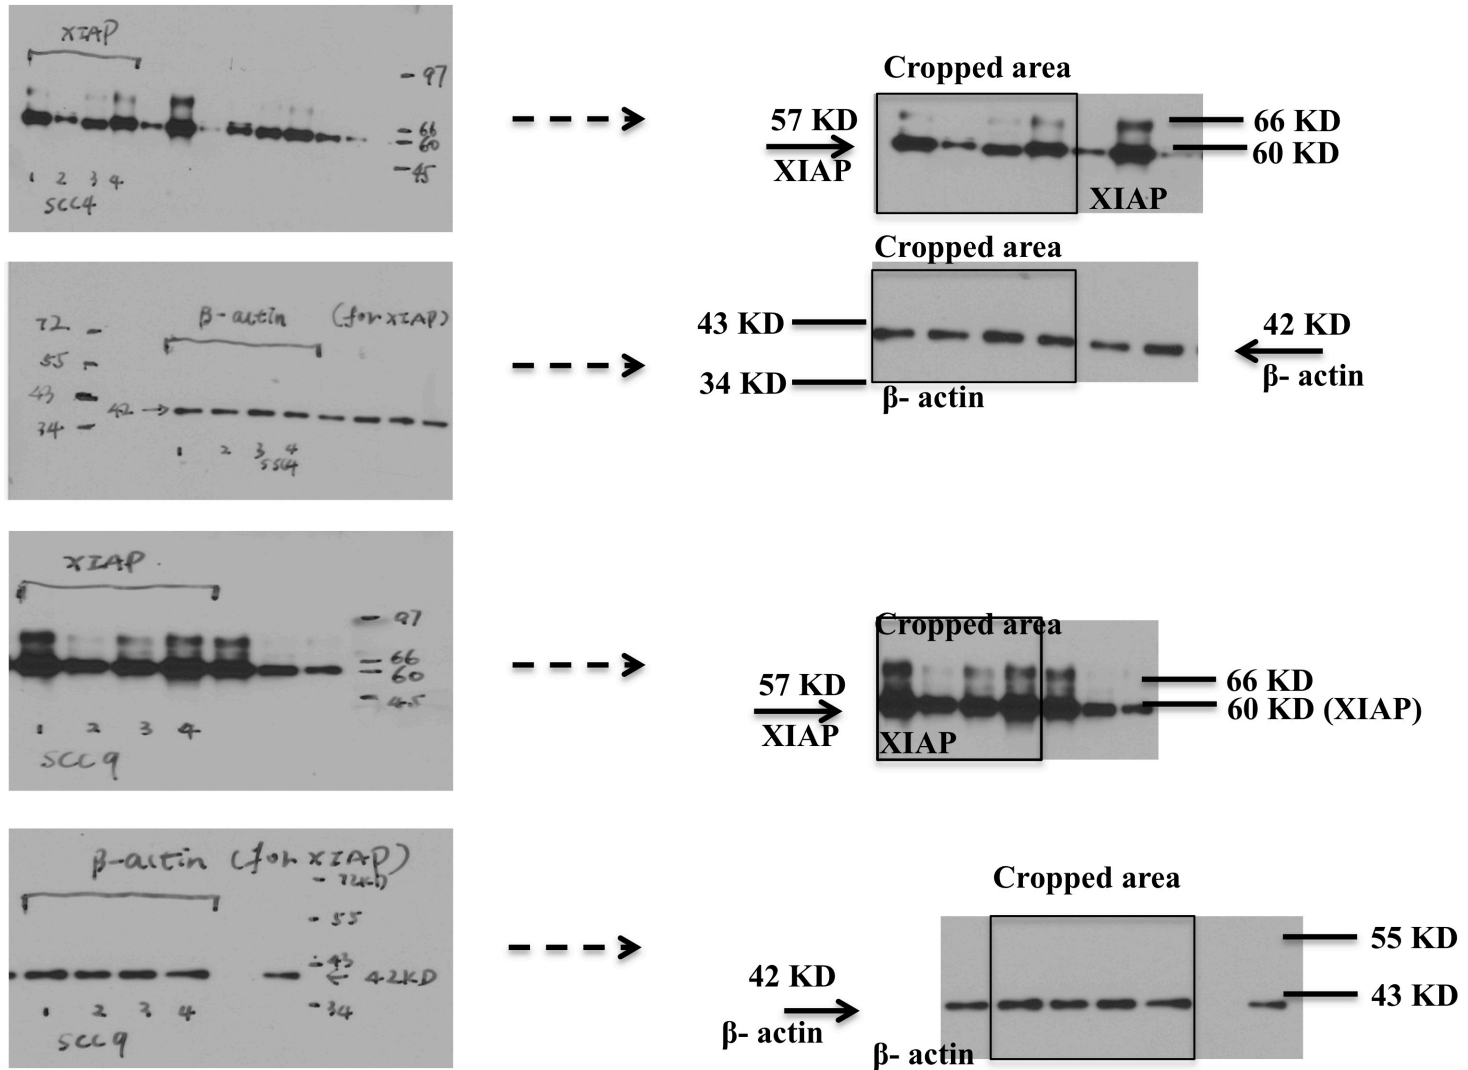

Uncropped blots of Figure 4A

## Supplementary Figure S4

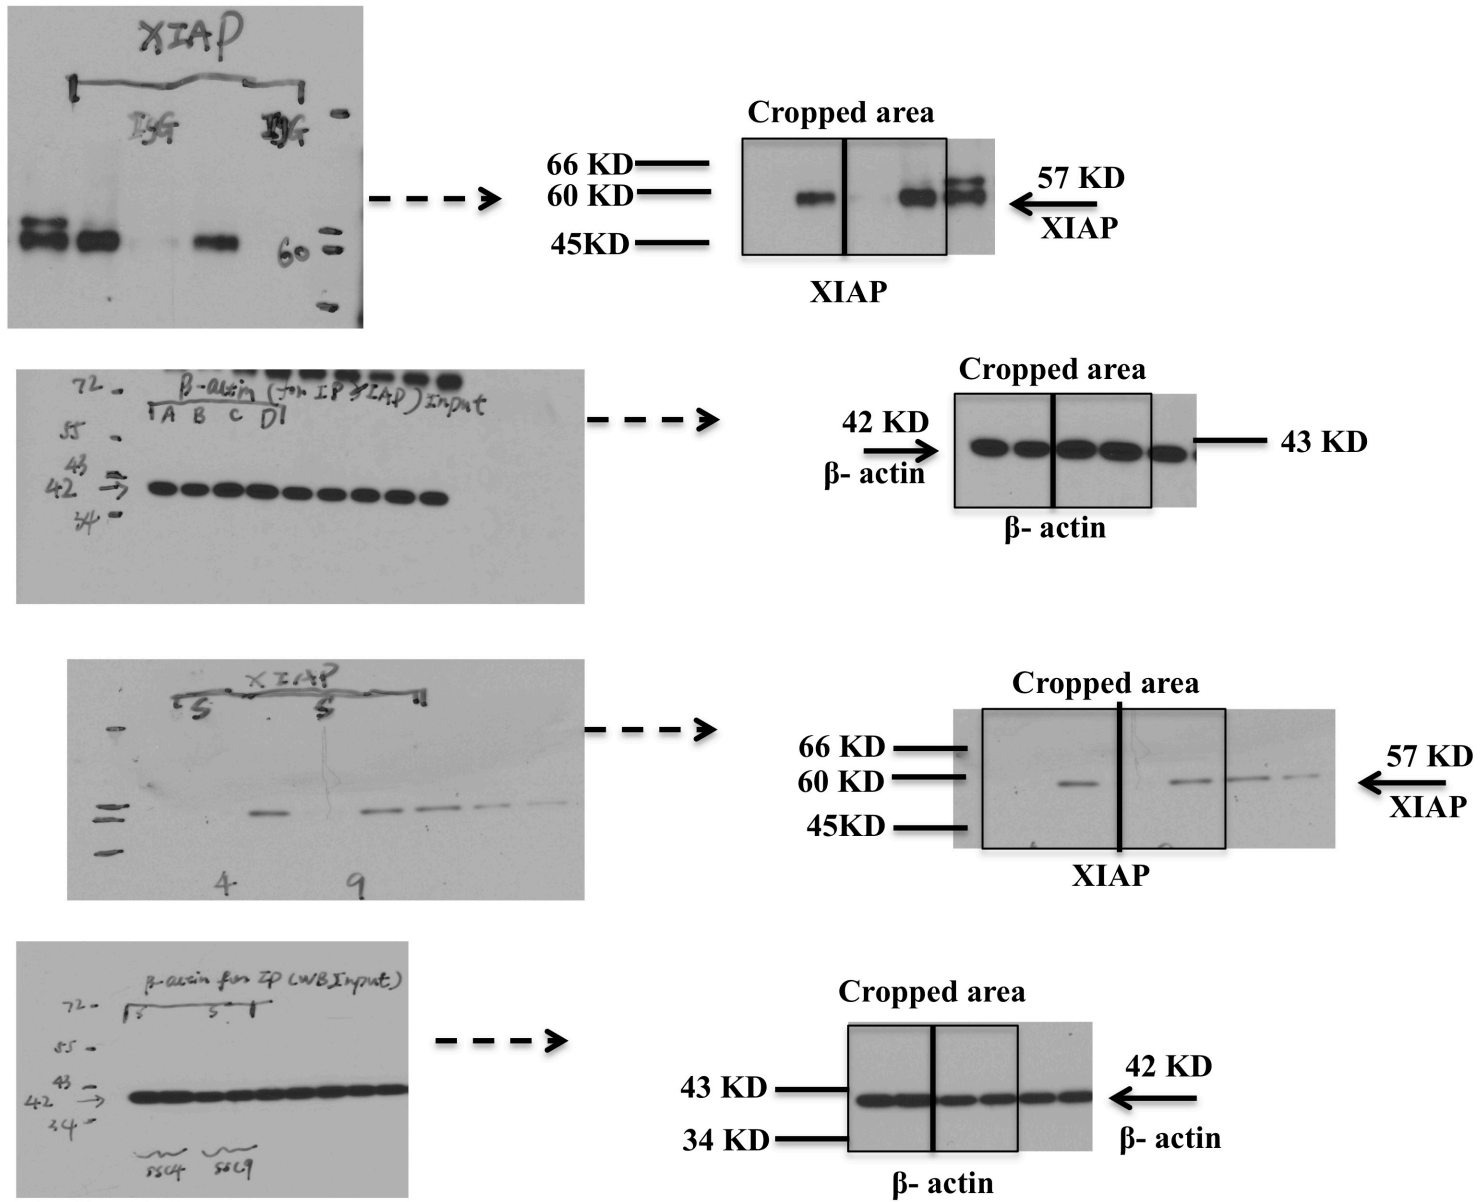

Uncropped blots of Figure 4C and 4D

**Supplementary Figure S5**

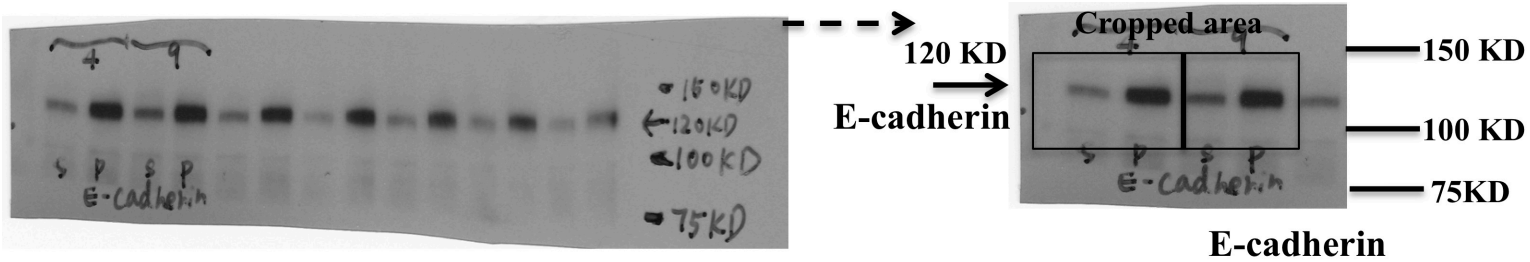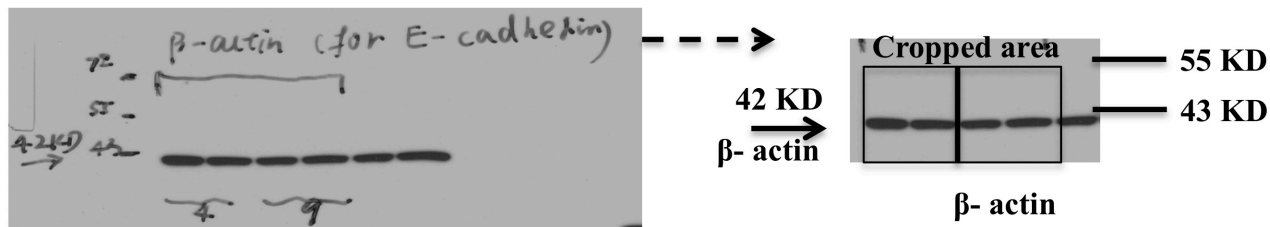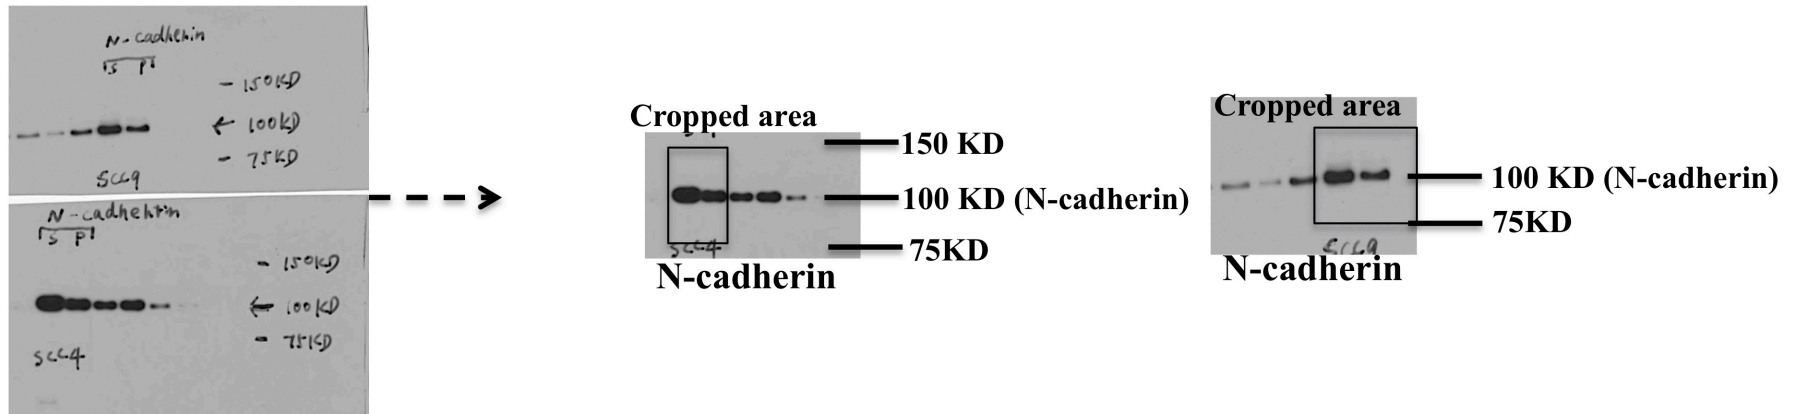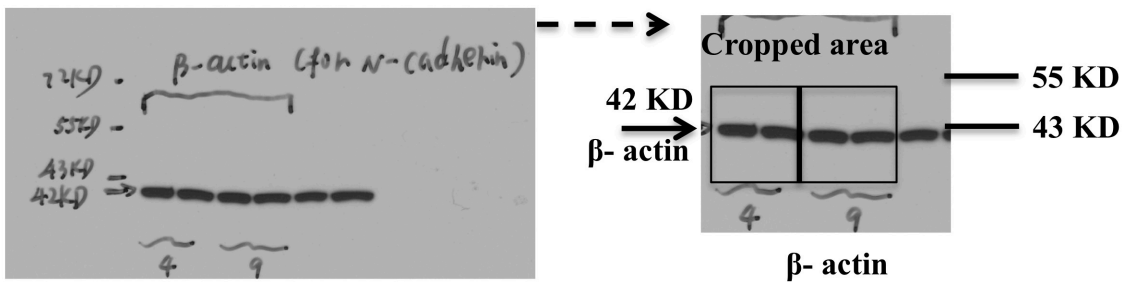

Uncropped blots of Figure 5D

Supplementary Figure S6
